# Supplementary material for: Conioselinum tenuissimum Root Extract Modulates Macrophage Activation via the Calcium–STAT3 Pathway
Source: MDPI journal article supplement (doi:10.3390/pr10112238), 2022-11-01
Supplement: s1 [file s1]

Archive with 1 entries (1 files):
- processes-1922074-supplementary.pdf
